# Supplementary material
Source: Royal Society of Chemistry journal article supplement (doi:10.1039/d5ay02166a)
Supplement: d5ay02166a1.pdf [file d5ay02166a1.pdf]

# Supporting Information

Synthetic blood-based infrared molecular fingerprints: artificial cohorts for  
methodological research

Niklas Leopold-Kerschbaumer<sup>1,2,\*</sup>, Nico Feiler<sup>3</sup>, and Kosmas V. Kepesidis<sup>1,3,\*</sup>

<sup>1</sup> Center for Molecular Fingerprinting (CMF), Frontiers Foundation, Budapest, Hungary

<sup>2</sup> Department of Mathematics, Ludwig-Maximilians-Universität München (LMU), Munich, Germany

<sup>3</sup> Faculty of Physics, Ludwig-Maximilians-Universität München (LMU), Garching, Germany

\* Correspondence: [kosmas.kepesidis@cmf.hu](mailto:kosmas.kepesidis@cmf.hu), [niklas.leopoldkerschbaumer@cmf.hu](mailto:niklas.leopoldkerschbaumer@cmf.hu)

Additional information including (A) the overview of pipeline to get simulated datasets, (B) Table about the basic demographics of all (sub-)cohorts, (C) effect sizes for spectra for all cohorts, (D) effect sizes for peak ratios for all cohorts, (E) Table of all AUCs for real and simulated datasets for all (sub-)cohorts for disease label classification or sex classification (if applicable).

## Contents

|          |                                                     |           |
|----------|-----------------------------------------------------|-----------|
| <b>A</b> | <b>Demographics of cohorts</b>                      | <b>S3</b> |
| <b>B</b> | <b>Peak ratio indices</b>                           | <b>S3</b> |
| <b>C</b> | <b>Effect sizes for spectra for all cohorts</b>     | <b>S4</b> |
| <b>D</b> | <b>Effect sizes for peak ratios for all cohorts</b> | <b>S5</b> |
| <b>E</b> | <b>AUCs for all FTIR datasets</b>                   | <b>S6</b> |

## List of Tables

|    |                                                                                                         |    |
|----|---------------------------------------------------------------------------------------------------------|----|
| S1 | Demographics across different diseases, stages, and train/test sets. . . . .                            | S3 |
| S2 | List of Peak Ratios and assigned indices in Figure 2B . . . . .                                         | S3 |
| S3 | AUCs for predicting the disease label and the sex on real and on simulated data on all cohorts. . . . . | S8 |

## A Demographics of cohorts

| Disease | Set             | Size | Population (%) |        |          |        | Age   |       | BMI   |      |
|---------|-----------------|------|----------------|--------|----------|--------|-------|-------|-------|------|
|         |                 |      | Healthy        |        | Diseased |        | Avg   | Std   | Avg   | Std  |
|         |                 |      | Male           | Female | Male     | Female |       |       |       |      |
| BLCA    | Test            | 213  | 59.62          | 25.82  | 10.80    | 3.76   | 66.42 | 10.64 | 26.53 | 4.75 |
|         | Train           | 347  | 40.35          | 10.66  | 38.90    | 10.09  | 71.41 | 9.87  | 26.32 | 4.89 |
| BRCA    | Test            | 281  | 0.00           | 67.07  | 0.00     | 32.93  | 62.00 | 13.19 | 25.51 | 4.88 |
|         | Train           | 82   | 0.00           | 50.53  | 0.00     | 49.47  | 60.07 | 13.65 | 25.57 | 5.49 |
| LUCA    | Test            | 219  | 53.42          | 20.55  | 15.07    | 10.96  | 66.39 | 10.13 | 26.71 | 5.01 |
|         | Train           | 908  | 20.48          | 29.96  | 26.32    | 23.24  | 65.08 | 10.39 | 25.69 | 4.87 |
|         | Stage 1 Train   | 144  | 27.78          | 22.92  | 27.78    | 21.53  | 69.74 | 8.68  | 25.69 | 4.97 |
|         | Stage 1+2 Train | 235  | 27.66          | 22.55  | 28.09    | 21.70  | 68.55 | 9.20  | 25.94 | 4.97 |
|         | Stage 2 Train   | 91   | 27.47          | 21.98  | 28.57    | 21.98  | 66.67 | 9.67  | 26.34 | 4.95 |
|         | Stage 3 Train   | 176  | 28.41          | 22.16  | 27.84    | 21.59  | 67.60 | 9.75  | 26.49 | 6.07 |
|         | Stage 4 Train   | 275  | 23.27          | 26.91  | 24.00    | 25.82  | 68.49 | 8.83  | 25.30 | 4.54 |
| PRCA    | Test            | 295  | 49.03          | 0.00   | 50.97    | 0.00   | 67.07 | 8.93  | 27.13 | 4.21 |
|         | Train           | 569  | 50.09          | 0.00   | 49.91    | 0.00   | 61.46 | 12.86 | 26.75 | 4.32 |

Table S1: Demographics across different diseases, stages, and train/test sets.

## B Peak ratio indices

| Index | Peak Ratio                                |
|-------|-------------------------------------------|
| 1     | $I_{1635}/I_{1654}$                       |
| 2     | $I_{1546}/I_{1655}$                       |
| 3     | $I_{1655}/(I_{1655}+I_{1548})$            |
| 4     | $I_{1684}/(I_{1655}+I_{1548})$            |
| 5     | $I_{1515}/(I_{1655}+I_{1548})$            |
| 6     | $I_{2959}/I_{2931}$                       |
| 7     | $(I_{2855}+I_{2927})/(I_{2962}+I_{2871})$ |
| 8     | $(I_{2851}+I_{2927})/(I_{1655}+I_{1548})$ |
| 9     | $I_{1239}/(I_{2851}+I_{2927})$            |
| 10    | $I_{1741}/I_{1640}$                       |
| 11    | $I_{1740}/I_{1400}$                       |
| 12    | $I_{2852}/I_{1400}$                       |
| 13    | $I_{1450}/I_{1539}$                       |
| 14    | $I_{1240}/I_{1517}$                       |
| 15    | $I_{1045}/I_{1545}$                       |
| 16    | $I_{1080}/I_{1550}$                       |
| 17    | $I_{1060}/I_{1230}$                       |
| 18    | $I_{1170}/I_{1080}$                       |
| 19    | $I_{1030}/I_{1080}$                       |
| 20    | $I_{1080}/I_{1243}$                       |
| 21    | $I_{1587}/(I_{1655}+I_{1548})$            |
| 22    | $I_{1156}/I_{1171}$                       |
| 23    | $I_{1243}/I_{1314}$                       |
| 24    | $I_{1453}/I_{1400}$                       |

Table S2: List of Peak Ratios and assigned indices in Figure 2B

## C Effect sizes for spectra for all cohorts

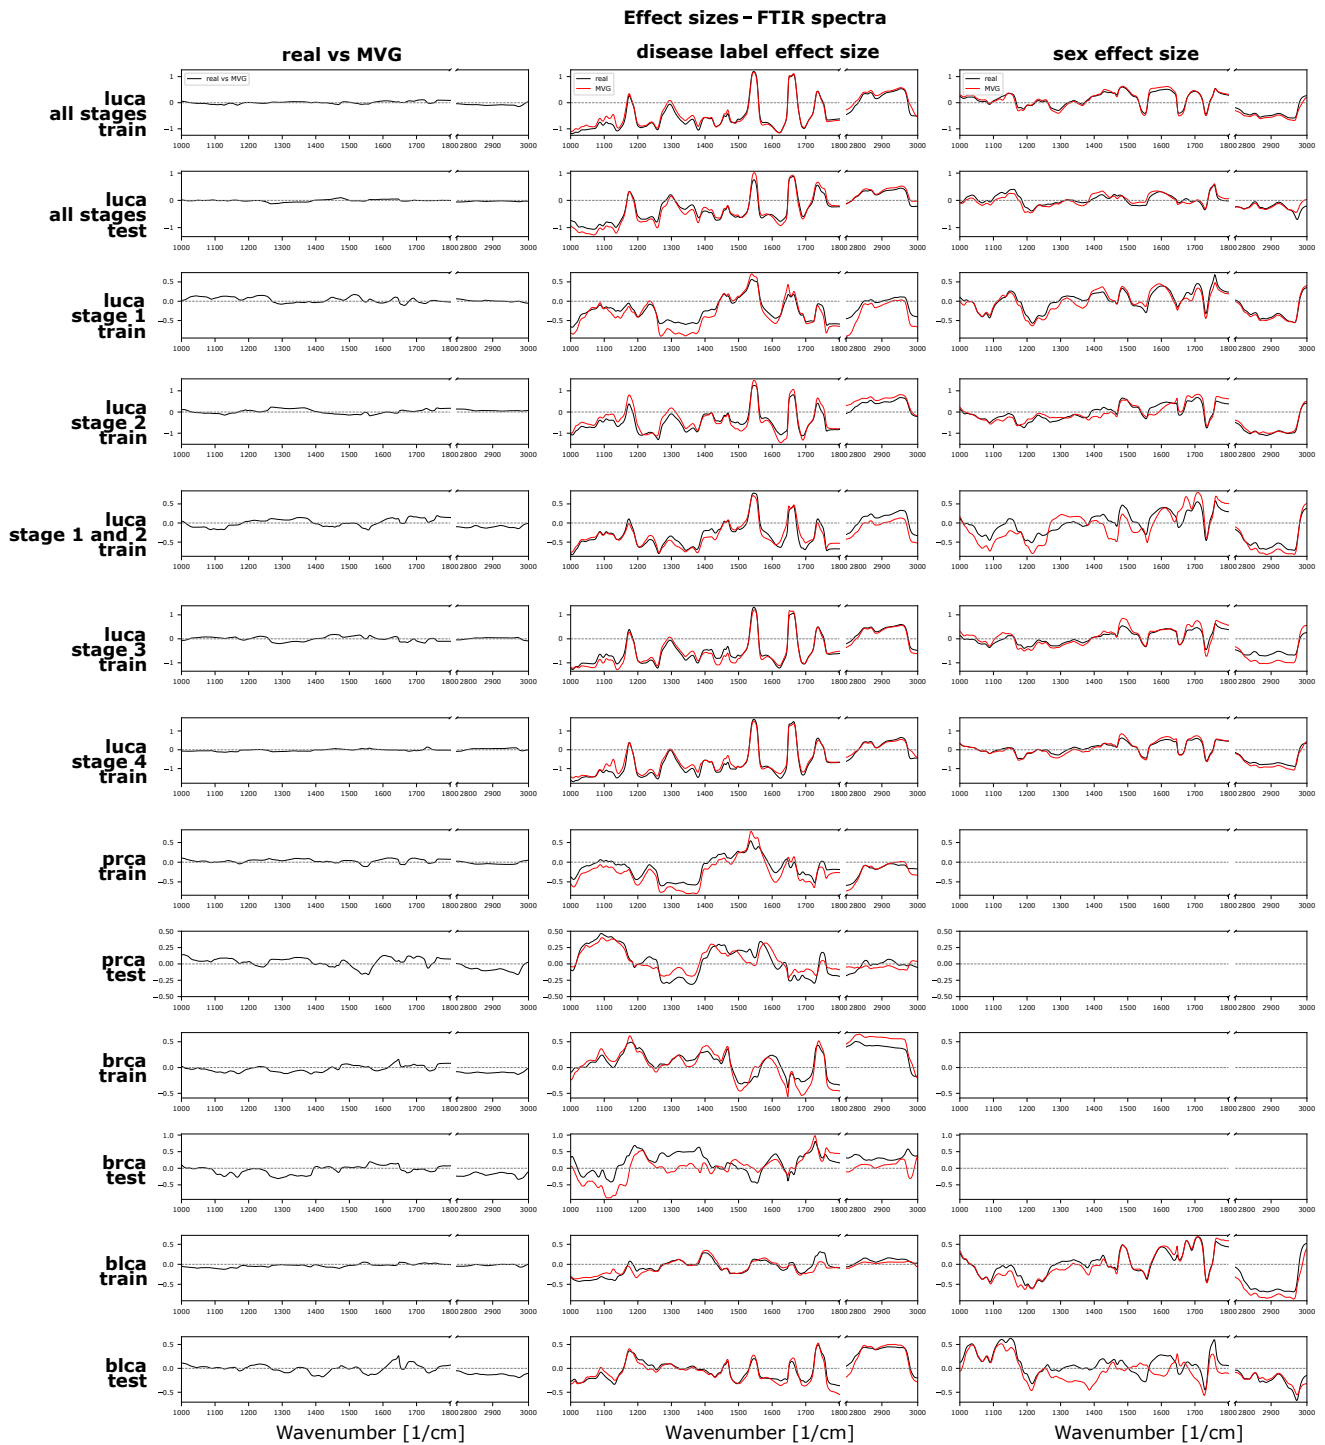

Figure S1: Effect sizes for spectra for all cohorts. Left column: Effect size, real vs MVG. Center Column: Effect size of disease label for each real and MVG cohort. Right column: Effect size of sex label for each real and MVG cohort.

## D Effect sizes for peak ratios for all cohorts

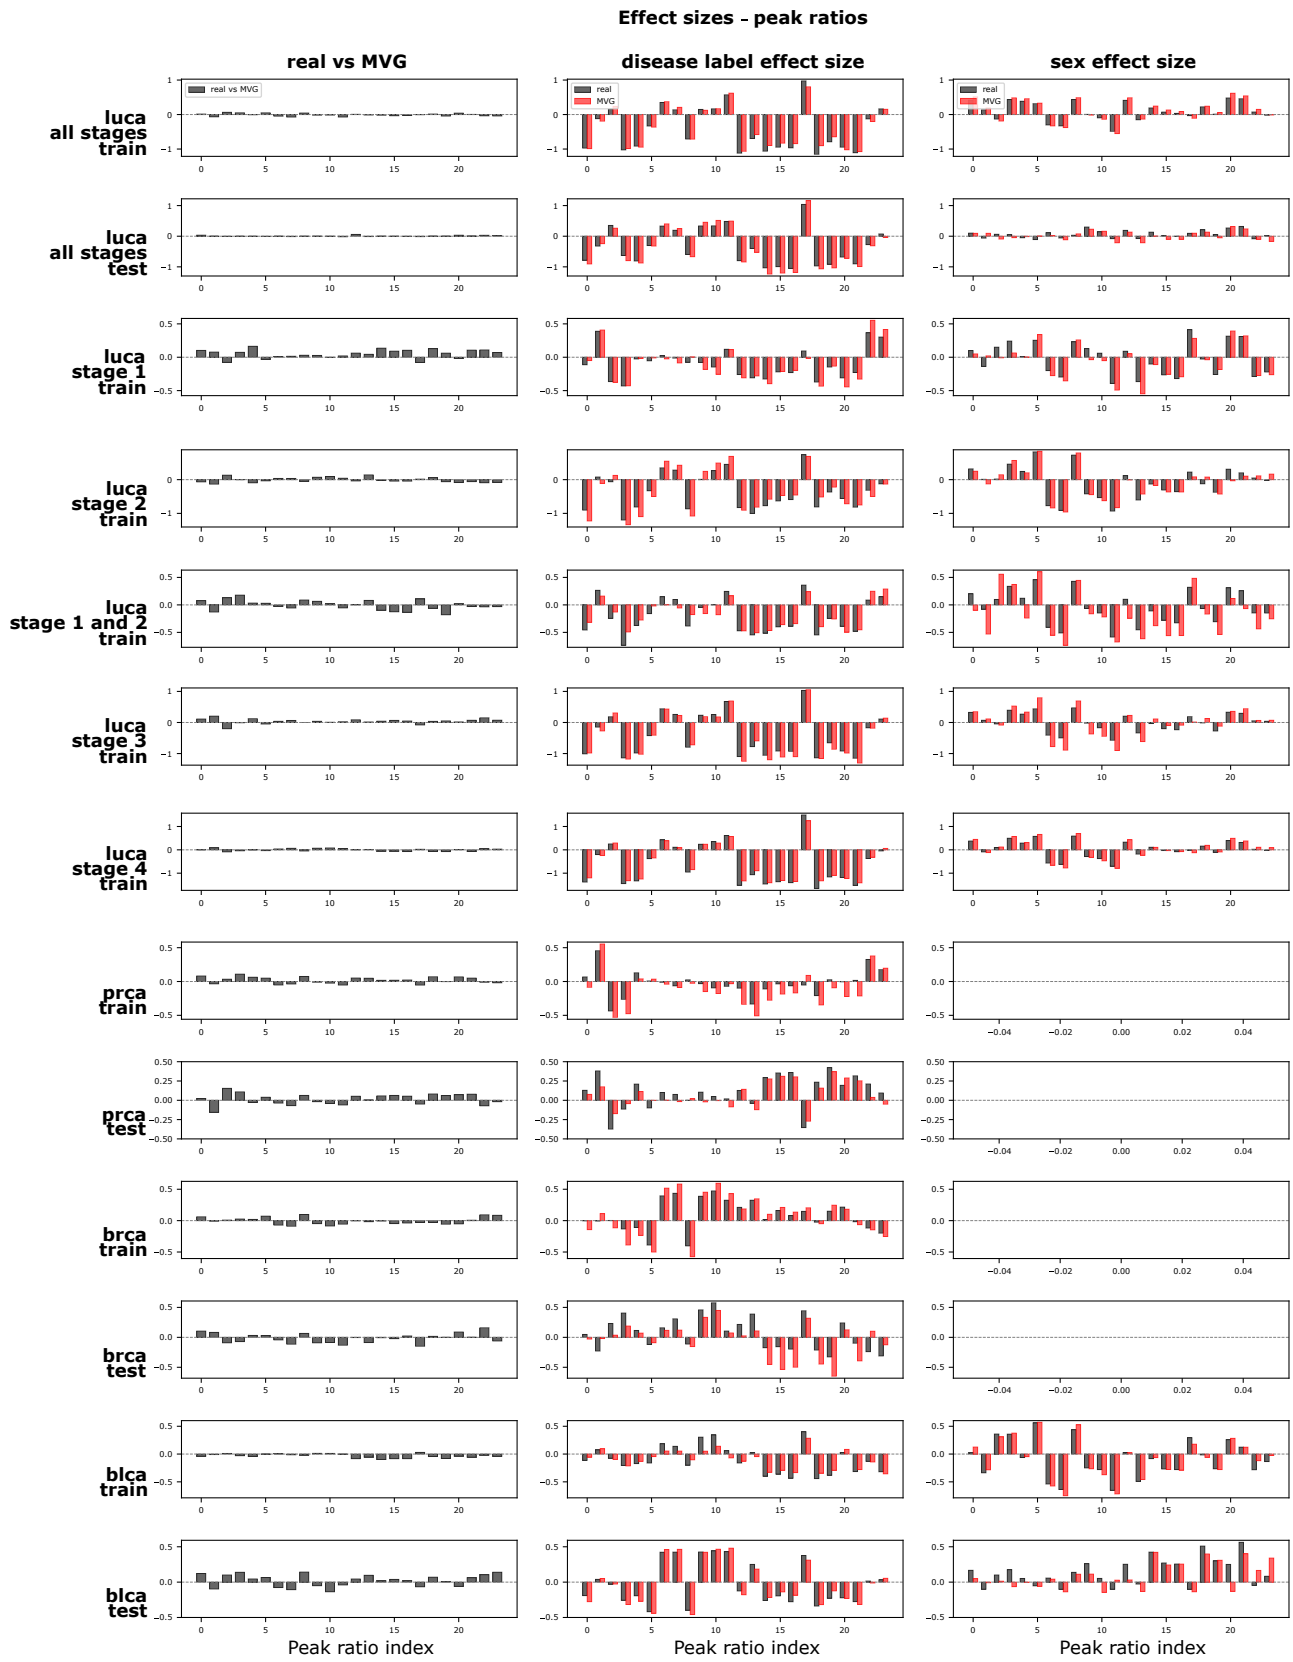

Figure S2: Effect sizes for peak ratios for all cohorts. Left column: Effect size, real vs MVG. Center Column: Effect size of disease label for each real and MVG cohort. Right column: Effect size of sex label for each real and MVG cohort.

## E AUCs for all FTIR datasets

| split       | datatype | cohort | stage | testtype | metric | sex   | auc   | std auc |       |       |      |
|-------------|----------|--------|-------|----------|--------|-------|-------|---------|-------|-------|------|
| sex&disease | mvg      | blca   | -     | cv       | label  | 0&1   | 77.36 | 6.48    |       |       |      |
|             |          |        |       |          | sex    | 0&1   | 93.79 | 4.74    |       |       |      |
|             |          | brca   | -     | cv       | label  | 0&1   | 86.22 | 6.55    |       |       |      |
|             |          |        |       |          | sex    | 0&1   | -     | -       |       |       |      |
|             |          | luca   | -     | cv       | -      | label | 0&1   | 93.09   | 2.19  |       |      |
|             |          |        |       |          |        | sex   | 0&1   | 94.17   | 2.15  |       |      |
|             |          |        |       |          | 1      | cv    | label | 0&1     | 87.6  | 9.23  |      |
|             |          |        |       |          |        |       | sex   | 0&1     | 92.77 | 6.5   |      |
|             |          |        |       |          | 1&2    | cv    | label | 0&1     | 85.09 | 9.02  |      |
|             |          |        |       |          |        |       | sex   | 0&1     | 94.5  | 3.75  |      |
|             |          |        |       |          | 2      | cv    | label | 0&1     | 86.94 | 10.54 |      |
|             |          |        |       |          |        |       | sex   | 0&1     | 88.25 | 12.8  |      |
|             |          |        |       |          | 3      | cv    | label | 0&1     | 91.08 | 7.13  |      |
|             |          |        |       |          |        |       | sex   | 0&1     | 92.44 | 5.16  |      |
|             |          |        |       |          | 4      | cv    | label | 0&1     | 94.41 | 4.09  |      |
|             |          |        |       |          |        |       | sex   | 0&1     | 92.44 | 4.52  |      |
|             |          | prca   | -     | cv       | label  | 0&1   | 83.21 | 5.78    |       |       |      |
|             |          |        |       |          | sex    | 0&1   | -     | -       |       |       |      |
|             |          | blca   | -     | test     | label  | 0&1   | 61.43 | -       |       |       |      |
|             |          |        |       |          | sex    | 0&1   | 78.84 | -       |       |       |      |
|             |          | brca   | -     | test     | label  | 0&1   | 50.17 | -       |       |       |      |
|             |          |        |       |          | sex    | 0&1   | -     | -       |       |       |      |
|             |          | luca   | -     | test     | label  | 0&1   | 78.14 | -       |       |       |      |
|             |          |        |       |          | sex    | 0&1   | 90.11 | -       |       |       |      |
|             | prca     | -      | test  | label    | 0&1    | 60.27 | -     |         |       |       |      |
|             |          |        |       | sex      | 0&1    | -     | -     |         |       |       |      |
|             | real     | blca   | -     | cv       | label  | 0&1   | 69.16 | 8.44    |       |       |      |
|             |          |        |       |          | sex    | 0&1   | 90.81 | 4.72    |       |       |      |
|             |          |        |       |          | brca   | -     | cv    | label   | 0&1   | 76.49 | 7.45 |
|             |          |        |       |          |        |       |       | sex     | 0&1   | -     | -    |
|             |          |        |       |          | luca   | -     | cv    | label   | 0&1   | 89.88 | 3.23 |
|             |          |        |       |          |        |       |       | sex     | 0&1   | 91.57 | 2.58 |
|             |          |        |       |          | 1      | cv    | label | 0&1     | 67.95 | 13.81 |      |
|             |          |        |       |          |        |       | sex   | 0&1     | 88.72 | 8.82  |      |
|             |          |        |       |          | 1&2    | cv    | label | 0&1     | 75.02 | 10.83 |      |
|             |          |        |       |          |        |       | sex   | 0&1     | 91.07 | 6.45  |      |
|             |          |        |       |          | 2      | cv    | label | 0&1     | 78.3  | 14.9  |      |
|             |          |        |       |          |        |       | sex   | 0&1     | 85.13 | 12.74 |      |
|             |          | 3      | cv    | label    | 0&1    | 86.32 | 9.38  |         |       |       |      |
|             |          |        |       | sex      | 0&1    | 84.08 | 9.77  |         |       |       |      |
|             |          | 4      | cv    | label    | 0&1    | 91.64 | 5.11  |         |       |       |      |
|             |          |        |       | sex      | 0&1    | 84.49 | 7.18  |         |       |       |      |
|             |          | prca   | -     | cv       | label  | 0&1   | 74.45 | 6.07    |       |       |      |
|             |          |        |       |          | sex    | 0&1   | -     | -       |       |       |      |
|             |          | blca   | -     | test     | label  | 0&1   | 61.5  | -       |       |       |      |
|             |          |        |       |          | sex    | 0&1   | 89.13 | -       |       |       |      |
|             |          | brca   | -     | test     | label  | 0&1   | 60.07 | -       |       |       |      |
|             |          |        |       |          | sex    | 0&1   | -     | -       |       |       |      |
| luca        |          | -      | test  | label    | 0&1    | 85.91 | -     |         |       |       |      |
|             |          |        |       | sex      | 0&1    | 92.68 | -     |         |       |       |      |
| prca        | -        | test   | label | 0&1      | 66.83  | -     |       |         |       |       |      |
|             |          |        | sex   | 0&1      | -      | -     |       |         |       |       |      |
| mvg         | blca     | -      | cv    | label    | 0      | 80.21 | 7.18  |         |       |       |      |
|             |          |        |       | label    | 0      | 93.94 | 3.73  |         |       |       |      |
|             |          |        |       | label    | 0      | 92.29 | 8.99  |         |       |       |      |

Continued on next page

| split   | datatype | cohort | stage | testtype | metric | sex | auc   | std auc |
|---------|----------|--------|-------|----------|--------|-----|-------|---------|
|         |          |        | 1&2   | cv       | label  | 0   | 89.32 | 9.36    |
|         |          |        | 2     | cv       | label  | 0   | 78.12 | 20.19   |
|         |          |        | 3     | cv       | label  | 0   | 90.22 | 11.76   |
|         |          |        | 4     | cv       | label  | 0   | 94.66 | 6.72    |
|         |          | prca   | -     | cv       | label  | 0   | 83.92 | 4.4     |
|         |          | blca   | -     | test     | label  | 0   | 63.06 | -       |
|         |          | luca   | -     | test     | label  | 0   | 76.17 | -       |
|         |          | prca   | -     | test     | label  | 0   | 60.27 | -       |
|         | real     | blca   | -     | cv       | label  | 0   | 64.2  | 10.16   |
|         |          | luca   | -     | cv       | label  | 0   | 89.19 | 4.92    |
|         |          |        | 1     | cv       | label  | 0   | 66.48 | 19.98   |
|         |          |        | 1&2   | cv       | label  | 0   | 72.92 | 12.19   |
|         |          |        | 2     | cv       | label  | 0   | 68.47 | 21.93   |
|         |          |        | 3     | cv       | label  | 0   | 84.06 | 10.4    |
|         |          |        | 4     | cv       | label  | 0   | 92.11 | 6.32    |
|         |          | prca   | -     | cv       | label  | 0   | 74.49 | 6.36    |
|         |          | blca   | -     | test     | label  | 0   | 62.38 | -       |
|         |          | luca   | -     | test     | label  | 0   | 77.08 | -       |
|         |          | prca   | -     | test     | label  | 0   | 66.83 | -       |
|         | mvg      | blca   | -     | cv       | label  | 1   | 90.25 | 11.79   |
|         |          | brca   | -     | cv       | label  | 1   | 85.79 | 6.94    |
|         |          | luca   | -     | cv       | label  | 1   | 91.85 | 3.24    |
|         |          |        | 1     | cv       | label  | 1   | 77.56 | 20.74   |
|         |          |        | 1&2   | cv       | label  | 1   | 82.6  | 11.67   |
|         |          |        | 2     | cv       | label  | 1   | 96.03 | 10.01   |
|         |          |        | 3     | cv       | label  | 1   | 88.35 | 14.56   |
|         |          |        | 4     | cv       | label  | 1   | 92.08 | 7.56    |
|         |          | blca   | -     | test     | label  | 1   | 47.05 | -       |
|         |          | brca   | -     | test     | label  | 1   | 50.17 | -       |
|         |          | luca   | -     | test     | label  | 1   | 93.7  | -       |
|         | real     | blca   | -     | cv       | label  | 1   | 71.1  | 20.08   |
|         |          | brca   | -     | cv       | label  | 1   | 77.08 | 8.01    |
|         |          | luca   | -     | cv       | label  | 1   | 86.63 | 5.44    |
|         |          |        | 1     | cv       | label  | 1   | 60.08 | 21.14   |
|         |          |        | 1&2   | cv       | label  | 1   | 69.69 | 12.51   |
|         |          |        | 2     | cv       | label  | 1   | 96.03 | 11.19   |
|         |          |        | 3     | cv       | label  | 1   | 75.12 | 15.22   |
|         |          |        | 4     | cv       | label  | 1   | 88.17 | 9.91    |
|         |          | blca   | -     | test     | label  | 1   | 49.09 | -       |
|         |          | brca   | -     | test     | label  | 1   | 60.07 | -       |
|         |          | luca   | -     | test     | label  | 1   | 90.83 | -       |
| disease | mvg      | blca   | -     | cv       | label  | -   | 78.73 | 7.19    |
|         |          |        |       |          | sex    | -   | -     | -       |
|         |          | brca   | -     | cv       | label  | -   | 87.17 | 6.58    |
|         |          |        |       |          | sex    | -   | -     | -       |
|         |          | luca   | -     | cv       | label  | -   | 89.61 | 2.88    |
|         |          |        |       |          | sex    | -   | -     | -       |
|         |          |        | 1     | cv       | label  | -   | 84.86 | 9.54    |
|         |          |        |       |          | sex    | -   | -     | -       |
|         |          |        | 1&2   | cv       | label  | -   | 85.95 | 6.34    |
|         |          |        |       |          | sex    | -   | -     | -       |
|         |          |        | 2     | cv       | label  | -   | 85.85 | 12.31   |
|         |          |        |       |          | sex    | -   | -     | -       |
|         |          |        | 3     | cv       | label  | -   | 93.45 | 5.5     |
|         |          |        |       |          | sex    | -   | -     | -       |
|         |          |        | 4     | cv       | label  | -   | 95.89 | 3.07    |
|         |          |        |       |          | sex    | -   | -     | -       |
|         |          | prca   | -     | cv       | label  | -   | 83.91 | 5.28    |

Continued on next page

| split | datatype | cohort | stage | testtype | metric | sex | auc   | std auc |
|-------|----------|--------|-------|----------|--------|-----|-------|---------|
|       |          |        |       |          | sex    | -   | -     | -       |
|       |          | blca   | -     | test     | label  | -   | 60.14 | -       |
|       |          |        |       |          | sex    | -   | -     | -       |
|       |          | brca   | -     | test     | label  | -   | 54.48 | -       |
|       |          |        |       |          | sex    | -   | -     | -       |
|       |          | luca   | -     | test     | label  | -   | 81.61 | -       |
|       |          |        |       |          | sex    | -   | -     | -       |
|       |          | prca   | -     | test     | label  | -   | 58.97 | -       |
|       |          |        |       |          | sex    | -   | -     | -       |
|       | real     | blca   | -     | cv       | label  | -   | 69.16 | 8.44    |
|       |          |        |       |          | sex    | -   | 90.81 | 4.72    |
|       |          | brca   | -     | cv       | label  | -   | 76.49 | 7.45    |
|       |          |        |       |          | sex    | -   | -     | -       |
|       |          | luca   | -     | cv       | label  | -   | 89.88 | 3.23    |
|       |          |        |       |          | sex    | -   | 91.57 | 2.58    |
|       |          |        | 1     | cv       | label  | -   | 67.95 | 13.81   |
|       |          |        |       |          | sex    | -   | 88.72 | 8.82    |
|       |          |        | 1&2   | cv       | label  | -   | 75.02 | 10.83   |
|       |          |        |       |          | sex    | -   | 91.07 | 6.45    |
|       |          |        | 2     | cv       | label  | -   | 78.3  | 14.9    |
|       |          |        |       |          | sex    | -   | 85.13 | 12.74   |
|       |          |        | 3     | cv       | label  | -   | 86.32 | 9.38    |
|       |          |        |       |          | sex    | -   | 84.08 | 9.77    |
|       |          |        | 4     | cv       | label  | -   | 91.64 | 5.11    |
|       |          |        |       |          | sex    | -   | 84.49 | 7.18    |
|       |          | prca   | -     | cv       | label  | -   | 74.45 | 6.07    |
|       |          |        |       |          | sex    | -   | -     | -       |
|       |          | blca   | -     | test     | label  | -   | 61.5  | -       |
|       |          |        |       |          | sex    | -   | 89.13 | -       |
|       |          | brca   | -     | test     | label  | -   | 60.07 | -       |
|       |          |        |       |          | sex    | -   | -     | -       |
|       |          | luca   | -     | test     | label  | -   | 85.91 | -       |
|       |          |        |       |          | sex    | -   | 92.68 | -       |
|       |          | prca   | -     | test     | label  | -   | 66.83 | -       |
|       |          |        |       |          | sex    | -   | -     | -       |

Table S3: AUCs for predicting the disease label and the sex on real and on simulated data on all cohorts.
